# Supplementary material
Source: Springer Nature journal article supplement (https://www.springermedizin.de/resource/supplementary/12906_2012_1251_MOESM10_ESM.pdf/9520040)

1)

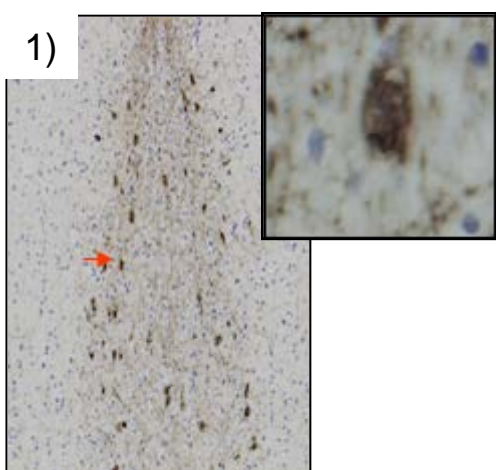

2)

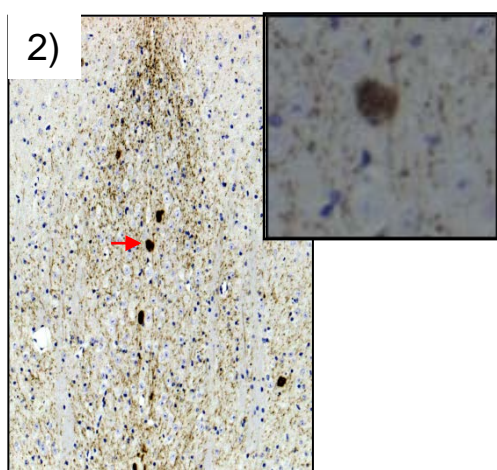

3)

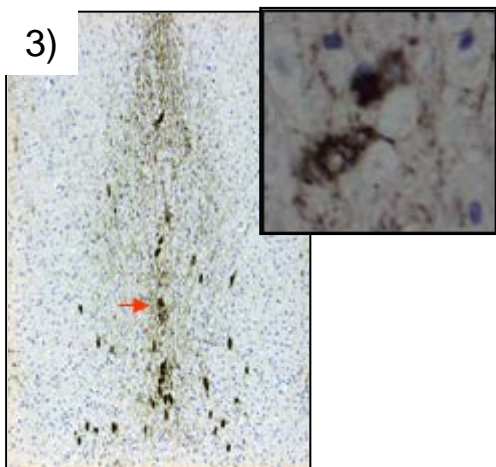

4)

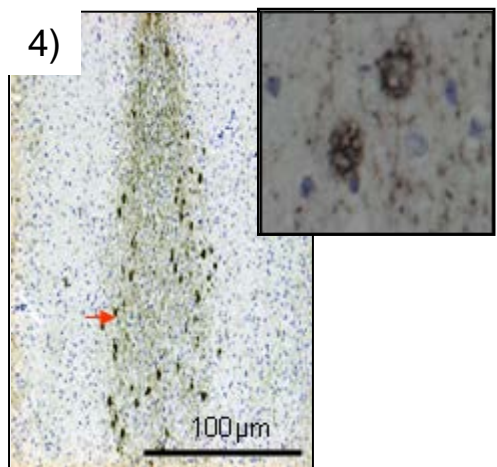

Supplement: MOESM10 [file 9520040]
